# Supplementary material for: Dynamic relocalization of replication origins by Fkh1 requires execution of DDK function and Cdc45 loading at origins
Source: eLife journal article supplement (doi:10.7554/elife.45512), 2019-05-14
Supplement: supp [file elife-45512-supp-v1.zip]

Archive with 12 entries (12 files):
- elife_poa_e45512_Figure_2_figure_supplement_1.pdf
- elife_poa_e45512_Figure_3_figure_supplement_1.pdf
- elife_poa_e45512_Supplementary_file_3.xlsx
- elife_poa_e45512_Figure_4_figure_supplement_1.pdf
- elife_poa_e45512_Figure_6_video_2.mp4
- elife_poa_e45512_Supplementary_file_1.xlsx
- elife_poa_e45512_Figure_6_video_1.mp4
- elife_poa_e45512_Figure_1_figure_supplement_1.pdf
- elife_poa_e45512_Figure_5_figure_supplement_1.pdf
- elife_poa_e45512_Supplementary_file_4.xlsx
- elife_poa_e45512_Supplementary_file_2.xlsx
- elife_poa_e45512_Transparent_Reporting_File.pdf
