# Supplementary material for: Dynamic relocalization of replication origins by Fkh1 requires execution of DDK function and Cdc45 loading at origins
Source: eLife journal article supplement (doi:10.7554/elife.45512), 2019-05-14
Supplement: supp [file elife-45512-supp-v1.zip › elife_poa_e45512_Supplementary_file_1.xlsx]

## Sheet: Sheet1
Plasmid	Source	Identifiers
pUN100-GFP*-Nup49	from V. Doye	Nup49-GFP
p403-Nup49-GFP	This paper (materials and methods)	Nup49-GFP
p404-Nup49-GFP	This paper (materials and methods)	Nup49-GFP
p402-TetR-Tomato	from J. Bachant	TetR
pblueKS-ADE2target	This paper (materials and methods)	TetR
pAFS135	from J. Bachant	LacI-GFP
p404-LacI-GFP	This paper (materials and methods)	LacI-GFP
pJBN164	from J. Bachant	lacO
pARS501-tetO	This paper (materials and methods)	ARS501-tetO
pARS1103-tetO	This paper (materials and methods)	ARS1103-tetO
pARS1303-tetO	This paper (materials and methods)	ARS1303-tetO
pARS710-lacO	This paper (materials and methods)	ARS710-lacO
pARS718-lacO	This paper (materials and methods)	ARS718-lacO
pARS1018-lacO	This paper (materials and methods)	ARS1018-lacO
pARS305-lacO	This paper (materials and methods)	ARS305-lacO
p501Δ-ARS305-ΔACS	This paper (materials and methods)	501Δ-ARS305-ΔACS
p501Δ-ARS305-∆2BS	This paper (materials and methods)	501Δ-ARS305-∆2BS
pKanMx-ars305∆-BInc	This paper (materials and methods)	BrdU
p406-cdc45-1	This paper (materials and methods)	cdc45-1
pJUcdc28-as1	from J. Li,	cdc28-as1
pJR179	from S.P. Bell	MCM4-14D
p405-GAL-FKH1	Peace et al., 2016	GAL-FKH1
p406-cdc7as3	Zhong et al., 2013	cdc7-as3
pFA6-KanMx	Longtine et al., 1998	KanMX
