# Supplementary material for: Dynamic relocalization of replication origins by Fkh1 requires execution of DDK function and Cdc45 loading at origins
Source: eLife journal article supplement (doi:10.7554/elife.45512), 2019-05-14
Supplement: supp [file elife-45512-supp-v1.zip › elife_poa_e45512_Supplementary_file_2.xlsx]

## Sheet: Sheet1
Primer Name	Oligonucleotide sequence
NotI-ARS305-5'	GGAATTGTGAGCGGATAACAATTTGTGGAATTGCGGCCGCcagtaatgaatattccaagt
XhoI-ARS305-5'	GGAATTGctcgagTGAGAACAAGTTCGGATGTGGAATCgatagaagtaatttctatat
NotI-ARS305-3'	GTTGTAAAACGACGGCCAGTGAATTCGAGCTCGCGGCCGCagactatgtaatggtaaaga
KpnI-ARS305-3'	GTGGAATTGTGAGCGGATAACAATTTGTGGAATTGGTACCatttaaatacatatatatac
Nup49-GFP F	atacgactcactatagggcgaattgggtaccgggcccccc
Nup49-GFP R	caagcgcgcaattaaccctcactaaagggaacaaaagctg
TetR-Tom F	ATCATGACGTAAGAAATGTATCTTAATTAAcgcgcgtatacgactcactatagggcgaattgggtccc
TetR-Tom R	ACACTGACATCTTTAACAACTTTTAATTAAtccaccgcggtggcggccgc
ARS501-tetO F	tatagggcgaattgGGTACCCCAAGAACGATCCAATTGC
ARS501-tetO R	agcttatcgataccgtcgacGGGTCAACTACCCTTCCC
ARS1103-tetO F	gcgcgcgtaatacgactcactatagggcgaattgGAAACTAATTCAGATTTGGGTAAAAG
ARS1103-tetO R	TGATACGGATCCcccgggctgcaggaattcgatatcaagcttGGATGCTGGGTAAATGCC
ARS1303-tetO F	gccagtgagcgcgcgtaatacgactcactatagggcgaattgCTCTGTGCCGTCTTCTCT
ARS1303-tetO R	TACGGATCCcccgggctgcaggaattcgatatcaagcttGTAAGTAGTCTGCTTCAACCA
ARS710-lacO F	acatgtggaattgtgagcggataacaatttgtggaattAAAGAGAGGCTGGTGACTTTTC
ARS710-lacO R	gacgttgtaaaacgacggccagtgaattcgagctcTGTAATCTCTAGTTATTAAGGACGC
ARS718-lacO F	catgtggaattgtgagcggataacaatttgtggaattCTTATGGGAAACTGGTTACATTC
ARS718-lacO R	gtcacgacgttgtaaaacgacggccagtgaattcgagctcGAGCTGATGAACCTTCTGTT
ARS1018-lacO F	gccacatgtggaattgtgagcggataacaatttgtggaattTTGAAGTCATCTACTGCCC
ARS1018-lacO R	acgacgttgtaaaacgacggccagtgaattcgagctcACATTACTATAATGAAAGCCGAG
ARS305-ΔACS-mut1	GGGAAAATAAACAATACATAACAAAcgAggTAAAAACCAACACA
ARS305-ΔACS-mut2	GGGAAAATAAACAATACATAACcctcgAggTAAAAACCAACACA
ARS305-Δ2BS-mut1	GTGTTGGTTTTTATATGTTTTGCTCGAGATTGTTTATTTTCCC
ARS305-Δ2BS-mut2	GCTTTAAGAACTACAAAGTAGGTACCAAATAATAAATCACACCG
FKH1-up	CAGAAACGGTATAGAGAGAACAGG
FKH1-down	CACAGAGGGTACAGAAGTCATAAAG
DBF4-up	CAGCCACTATAGCAACTACTGC
DBF4-down	ATTAACCGCGGTGGGTACTC
Cdc45-F	cagtgagcgcgcgtaatacgactcactatagggcgaattgATGTATTATGGAATCAGCCA
Cdc45-R	aagcgcgcaattaaccctcactaaagggaacaaaagctgTTATAACAATCCACTCAAGGT
ADE2-up-F	AACTTTTAATTAAGATACATTTCTTACGTCATGATTGATTATTACAGCTATGC
ADE2-int-R	aatacgactcactatagggcgaattggagctcCTTTACAACGAAGTTACCTCTTCCATCG
ADE2-farup-F	ccctcactaaagggaacaaaagctgggtaccCCTTTTGATGCGGAATTGACTTTTTCTTG
ADE2-up-R	GACGTAAGAAATGTATCTTAATTAAAAGTTGTTAAAGATGTCAGTGTTATGTTGGTG
