# Supplementary material for: Dynamic relocalization of replication origins by Fkh1 requires execution of DDK function and Cdc45 loading at origins
Source: eLife journal article supplement (doi:10.7554/elife.45512), 2019-05-14
Supplement: supp [file elife-45512-supp-v1.zip › elife_poa_e45512_Supplementary_file_3.xlsx]

## Sheet: Sheet1
Strain	Source or reference	Identifiers	Genotype
SSy161	Viggiani and Aparicio, 2006	Background	MATa, ade2-1, leu2-3,112, his3-11,15 trp1-1, ura3-1, can1-100, bar1∆::hisG
HYy38	This paper (materials and methods)	BrdU	fkh1∆::KanMx, fkh2-dsm, leu2::GAL-FKH1::LEU2, ars501∆::ARS305-tetO-URA3, ade2::TetR-Tomato::ADE2, ars305∆::BrdU-Inc-TRP1
HYy80	This paper (materials and methods)	ars501∆::ARS305::tetO	fkh1Δ::KanMx, fkh2-dsm, ars501Δ::ARS305::tetO-URA3, ade2::TetR-Tomato::ADE2, trp1::NUP49-GFP::TRP1
HYy113	This paper (materials and methods)	ars501∆::ARS305::tetO	fkh2-dsm, leu2::GAL-FKH1::LEU2, ars501∆::ARS305-tetO-URA3, ade2::TetR-Tomato::ADE2, trp1::NUP49-GFP::TRP1, ars305∆::BrdU-Inc-KanMX
HYy119	This paper (materials and methods)	ars501∆::ars305-∆ACS::tetO	fkh1∆::KanMx, fkh2-dsm, leu2::GAL-FKH1::LEU2, ars501∆::ars305-∆ACS::tetO-URA3, ade2::TetR-Tomato::ADE2, trp1::NUP49-GFP::TRP1
HYy120	This paper (materials and methods)	ars501∆::ars305-∆2BS::tetO	fkh1∆::KanMx, fkh2-dsm, leu2::GAL-FKH1::LEU2, ars501∆::ars305-∆2BS::tetO-URA3, ade2::TetR-Tomato::ADE2, trp1::NUP49-GFP::TRP1
HYy123	This paper (materials and methods)	cdc7-as3	FKH1-3XFLAG-TRP1, cdc7-as3
HYy132	This paper (materials and methods)	ars501∆::ARS305::tetO	fkh1∆::KanMx, fkh2-dsm, leu2::GAL-FKH1::LEU2, ars501∆::ARS305::tetO-URA3, ade2::TetR-Tomato::ADE2, trp1::NUP49-GFP::TRP1
HYy147	This paper (materials and methods)	ARS305::lacO	ARS305::lacO-LEU2, trp1::LacI-GFP::TRP1, ARS607::tetO-URA3, ade2::TetR-Tomato::ADE2, his3::NUP49-GFP::HIS3, fkh1∆::KanMx
HYy151	This paper (materials and methods)	ARS305::lacO	ARS305::lacO-LEU2, trp1::LacI-GFP::TRP1, ade2::TetR-Tomato::ADE2, his3::NUP49-GFP::HIS3
HYy157	This paper (materials and methods)	ars501∆::ARS305::tetO	ars501∆::ARS305::tetO-URA3, ade2::TetR-Tomato::ADE2, trp1::NUP49-GFP::TRP1
HYy160	This paper (materials and methods)	ARS501::tetO	ARS501::tetO-URA3, ade2::TetR-Tomato::ADE2, trp1::NUP49-GFP::TRP1, leu2::GAL-FKH1::LEU2
HYy165	This paper (materials and methods)	ARS1103::tetO	ARS1103::tetO-URA3, ade2::TetR-Tomato::ADE2, trp1::NUP49-GFP::TRP1, leu2::GAL-FKH1::LEU2
HYy166	This paper (materials and methods)	ARS1303::tetO	ARS1303::tetO-URA3, ade2::TetR-Tomato::ADE2, trp1::NUP49-GFP::TRP1, leu2::GAL-FKH1::LEU2
HYy172	This paper (materials and methods)	ARS1103::tetO	ARS1103::tetO-URA3, ade2::TetR-Tomato::ADE2, trp1::NUP49-GFP::TRP1, leu2::GAL-FKH1::LEU2, fkh1∆::KanMx
HYy173	This paper (materials and methods)	ARS1303::tetO	ARS1303::tetO-URA, ade2::TetR-Tomato::ADE2, trp1::NUP49-GFP::TRP1, leu2::GAL-FKH1::LEU2, fkh1∆::KanMx
HYy177	This paper (materials and methods)	MCM4-14D	fkh1∆::KanMx, fkh2-dsm, leu2::GAL-FKH1::LEU2, ars501∆::ARS305::tetO-URA3, ade2::TetR-Tomato::ADE2, trp1::NUP49-GFP::TRP1, cdc7-as3, mcm4::NatMX4-pMCM5-MCM4[D(D/E)+DS(P/Q)]
HYy181	This paper (materials and methods)	dbf4∆C	ARS305::lacO-LEU2, trp1::LacI-GFP::TRP1, ade2::TetR-Tomato::ADE2, his3::NUP49-GFP::HIS3, dbf4∆C::KanMX
HYy184	This paper (materials and methods)	cdc45-1	ARS305::lacO-LEU2, trp1::LacI-GFP::TRP1, his3::NUP49-GFP::HIS3, cdc45-1
HYy186	This paper (materials and methods)	cdc7-as3	fkh1∆::KanMx, fkh2-dsm, leu2::GAL-FKH1::LEU2, ars501∆::ARS305::tetO-URA3, ade2::TetR-Tomato::ADE2, trp1::NUP49-GFP::TRP1, cdc7-as3
HYy191	This paper (materials and methods)	cdc7-4	ARS305::lacO-LEU2, trp1::LacI-GFP::TRP1, his3::NUP49-GFP::HIS3, bar1∆::KanMX, cdc7-4
HYy197	This paper (materials and methods)	cdc28-as1	ARS305::lacO‐LEU2, trp1::LacI‐GFP::TRP1, ade2::TetR-‐Tomato::ADE2, his3::NUP49‐GFP::HIS3, cdc28-as1
HYy198	This paper (materials and methods)	ARS501::tetO	ARS501::tetO‐URA3, ade2::TetR‐Tomato::ADE2, his3::NUP49‐GFP::HIS3, trp1::LacI‐GFP::TRP1
HYy201	This paper (materials and methods)	ARS501::tetO	ARS501::tetO-­URA3, ade2::TetR‐Tomato::ADE2, ARS305::lacO‐LEU2, trp1::LacI‐GFP::TRP1, his3::NUP49‐GFP::HIS3, fkh1Δ::KanMx
MPy6	This paper (materials and methods)	ARS710-lacO	ARS710-lacO-LEU2, trp1::LacI-GFP::TRP1, his3::NUP49-GFP::HIS3
MPy10	This paper (materials and methods)	ARS710-lacO	ARS710-lacO-LEU2, trp1::LacI-GFP::TRP1, his3::NUP49-GFP::HIS3, fkh1∆::KanMx
MPy19	This paper (materials and methods)	ARS1018-lacO	ARS1018-lacO-LEU2, trp1::LacI-GFP::TRP1, his3::NUP49-GFP::HIS3
MPy20	This paper (materials and methods)	ARS718-lacO	ARS718-lacO-LEU2, trp1::LacI-GFP::TRP1, his3::NUP49-GFP::HIS3
MPy21	This paper (materials and methods)	ARS718-lacO	ARS718-lacO-LEU2, trp1::LacI-GFP::TRP1, his3::NUP49-GFP::HIS3, fkh1∆::KanMx
MPy22	This paper (materials and methods)	ARS1018-lacO	ARS1018-lacO-LEU2, trp1::LacI-GFP::TRP1, his3::NUP49-GFP::HIS3, fkh1∆::KanMx
MPy43	This paper (materials and methods)	ars305-­ΔACS-lacO	ars305-­ΔACS-lacO­‐LEU2, trp1::LacI‐GFP::TRP1, ade2::TetR‐Tomato::ADE2, his3::NUP49-­GFP::HIS3
MPy46	This paper (materials and methods)	ARS305-­Δ2BS-lacO	ARS305-­Δ2BS-lacO‐LEU2, trp1::LacI‐GFP::TRP1, ade2::TetR‐Tomato::ADE2, his3::NUP49-­GFP::HIS3
OAy1102	This paper (materials and methods)	FKH1-3XFLAG	FKH1-3XFLAG-TRP1
