# Supplementary material for: Dynamic relocalization of replication origins by Fkh1 requires execution of DDK function and Cdc45 loading at origins
Source: eLife journal article supplement (doi:10.7554/elife.45512), 2019-05-14
Supplement: supp [file elife-45512-supp-v1.zip › elife_poa_e45512_Supplementary_file_4.xlsx]

## Sheet: Sheet1
Reagent type (species) or resource	Designation	Source or reference	Identifiers	Additional information
antibody	Mouse monoclonal anti-FLAG-antibody (Fkh1-ChIP)	Sigma-Aldrich Cor., (catalog# F1804)	RRID:AB_262044	ChIP-Fkh1 (1:100)
antibody	Mouse monoclonal anti-BrdU (BrdU-IP-seq)	life Technologies Cor., (catalog# 033900)	RRID:AB_2532917	BrdU-IP-seq (1:100)
chemical compound, drug	PP1	R&D System Inc (catalog# 1397)
chemical compound, drug	hydroxyurea	Sigma-Aldrich Cor., (catalog# H8627)
chemical compound, drug	BrdU	Sigma-Aldrich Cor., (catalog# B5002)
chemical compound, drug	alpha-mating factor acetate salt	Sigma-Aldrich Cor., (catalog# T6901)
