# Supplementary figures and images for: Dynamic relocalization of replication origins by Fkh1 requires execution of DDK function and Cdc45 loading at origins
Source: eLife journal article supplement (doi:10.7554/elife.45512), 2019-05-14

Figure 2-figure supplement 1

A

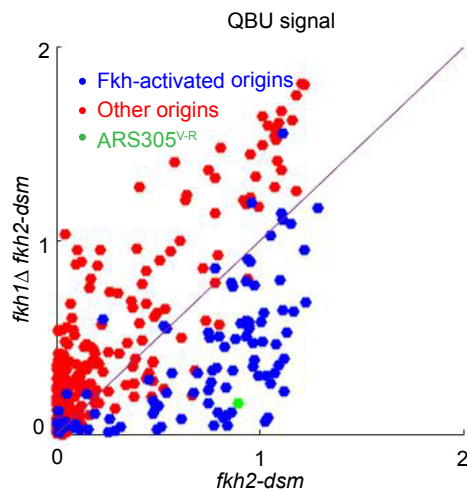

B

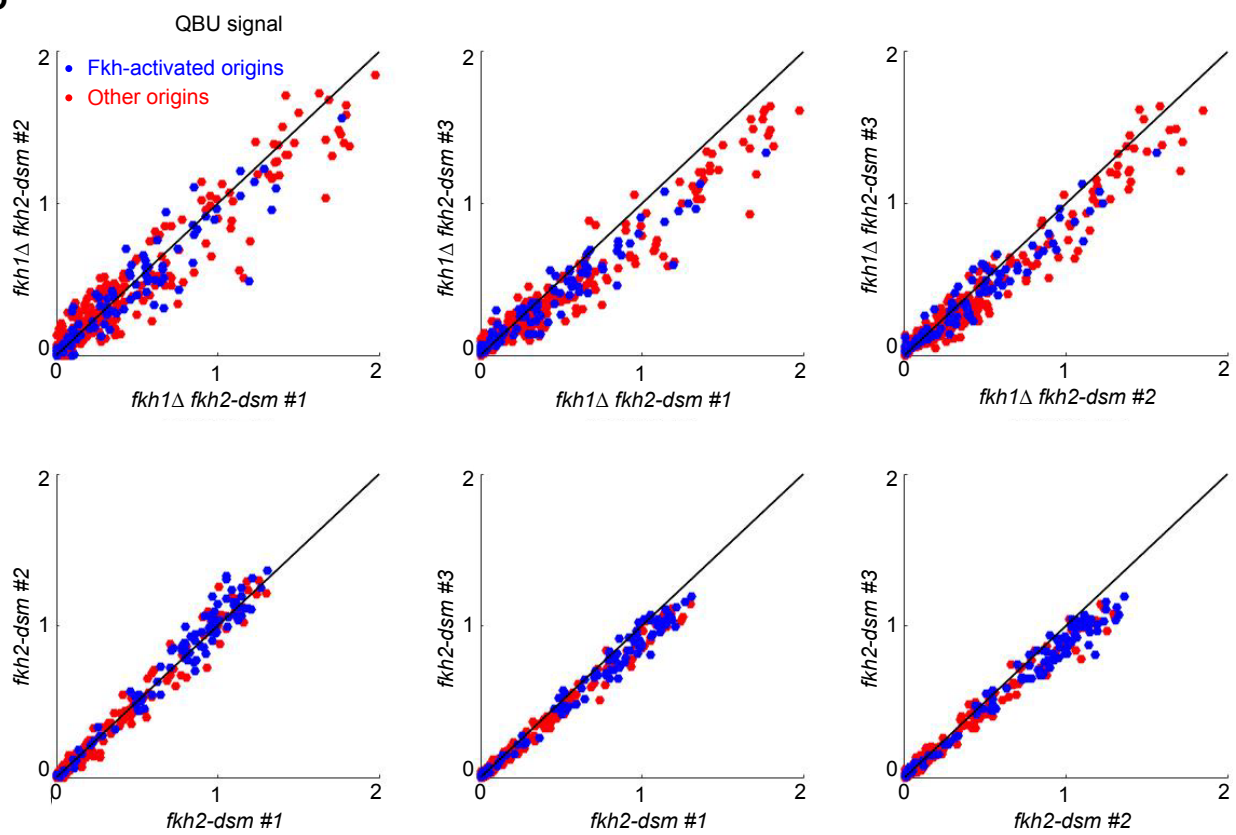

Supplement: supp [file elife-45512-supp-v1.zip]

Figure 1-figure supplement 1

A

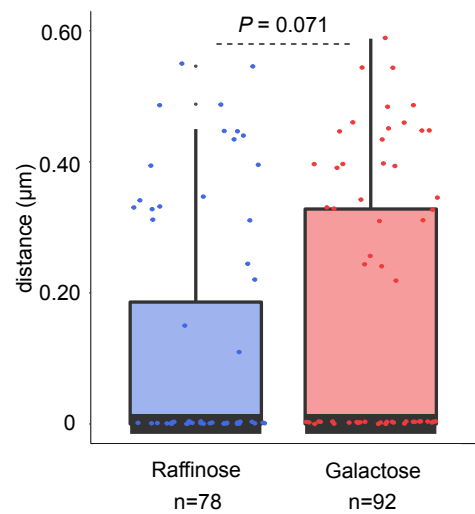

B

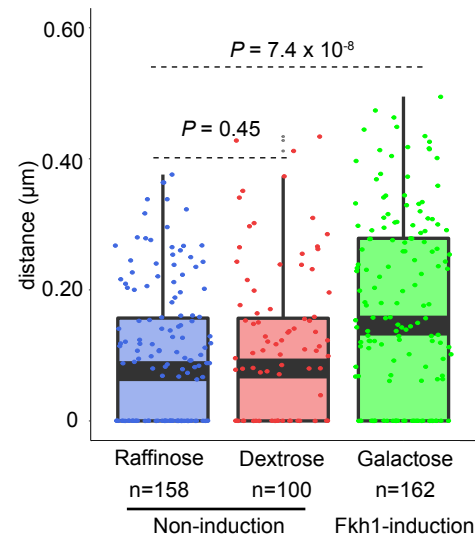

Supplement: supp [file elife-45512-supp-v1.zip]

Figure 3-figure supplement 1

A

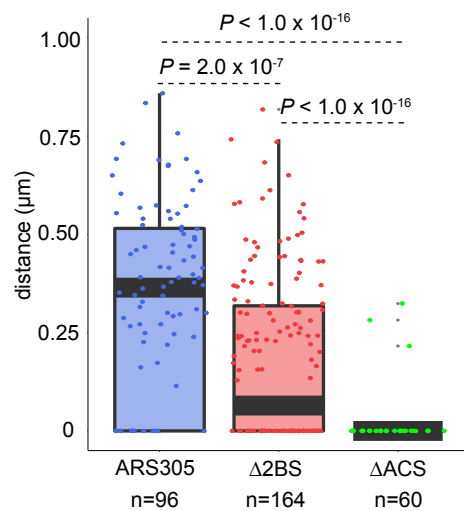

B

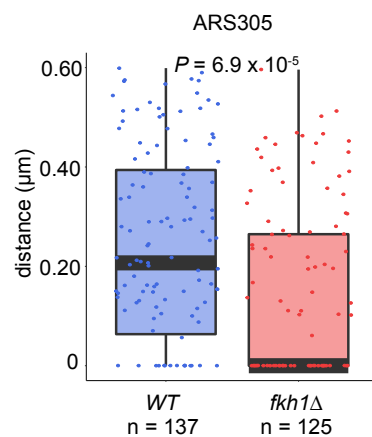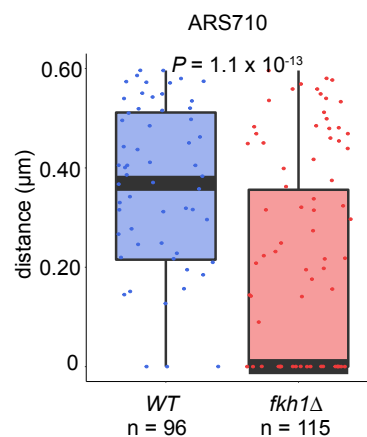

C

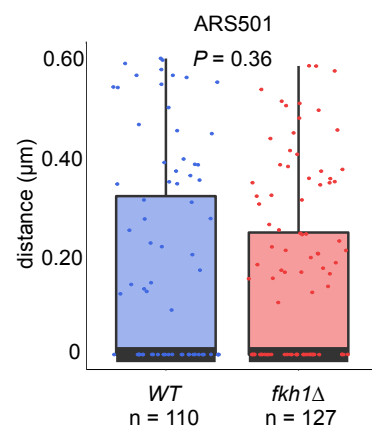

Supplement: supp [file elife-45512-supp-v1.zip]

Figure 4-figure supplement 1

A

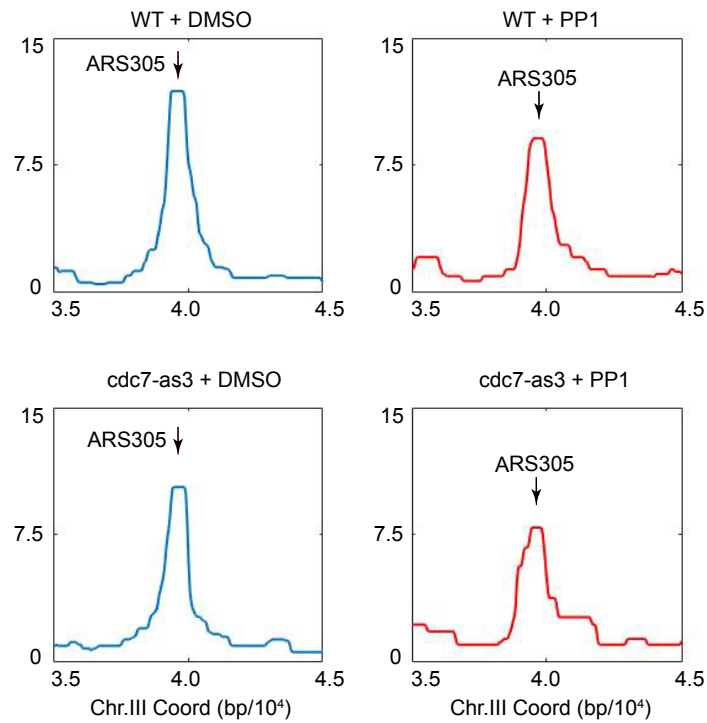

B

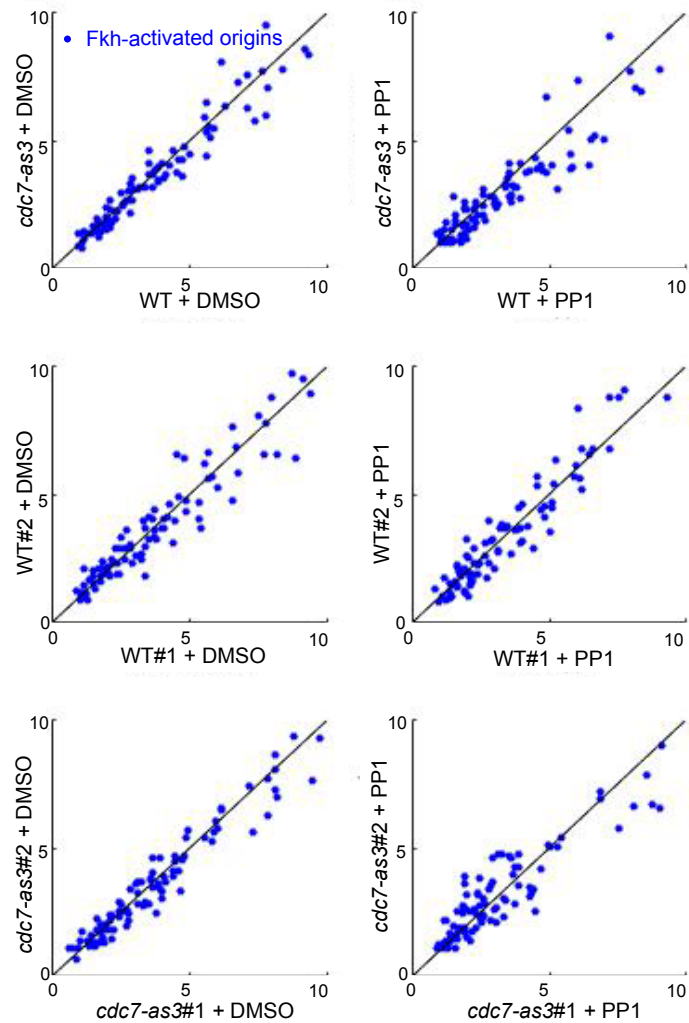

Supplement: supp [file elife-45512-supp-v1.zip]

Figure 5-figure supplement 1

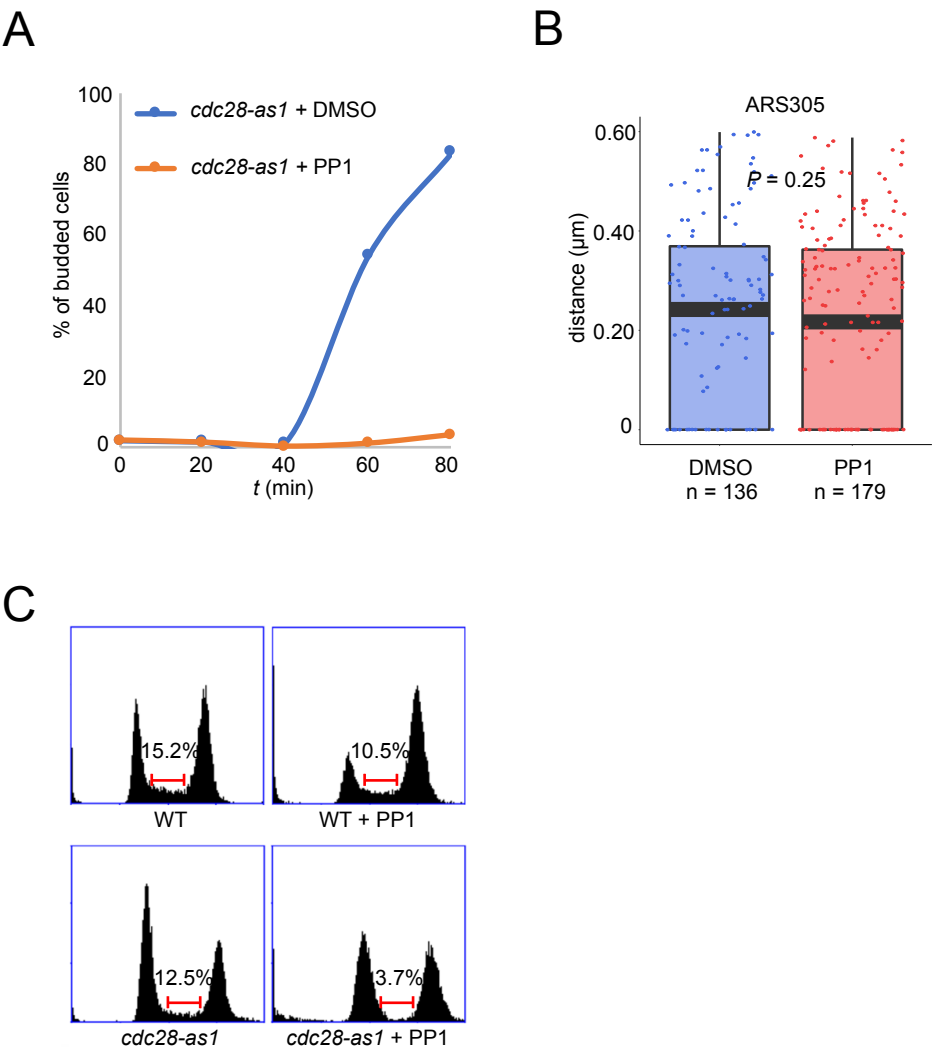

Supplement: supp [file elife-45512-supp-v1.zip]
